# Supplementary material for: Determination of the Pharmacokinetics and Pharmacodynamics of Isoniazid, Rifampicin, Pyrazinamide and Ethambutol in a Cross-Over Cynomolgus Macaque Model of Mycobacterium tuberculosis Infection
Source: MDPI journal article supplement (doi:10.3390/pharmaceutics14122666), 2022-11-30
Supplement: s1 [file s1]

## Supplementary data

Supplementary Table S1: PK parameters of TB drugs in Rhesus Macaques

| Study | Treatment (s)                                                                    | Drug, dose, dosage form  | Blood Cmax (mean, ng/mL) | Tmax (mean, h) | AUC <sub>0-inf</sub> (calc, mg.h/L) | CL/F (L/h/kg) [%RSE] | V (L/h/kg) [%RSE] | KA (h <sup>-1</sup> ) [%RSE] | Terminal Half-life (h) |      |
|-------|----------------------------------------------------------------------------------|--------------------------|--------------------------|----------------|-------------------------------------|----------------------|-------------------|------------------------------|------------------------|------|
| 1     | R 10                                                                             | RIF, 10 mg/kg solution   | 1460                     | 1.8            | 10.5                                | 0.95 [8.4]           | 4.16 [19.4]       | 1.15 [39.5]                  | 3.0                    |      |
|       | Z 30                                                                             | PZA 30 mg/kg solution    | 7803                     | 1.4            | 27.0                                | 1.11 [8.6]           | 1.35 [3.7]        | 0.82 [10.0]                  | 0.8                    |      |
|       | R 10, Z 30                                                                       | RIF 10 mg/kg solution    | 2658                     | 2.9            | 31.7                                | 0.31 [154]           | 1.78 [234]        | 2.29 [646]                   | 3.9                    |      |
|       |                                                                                  | PZA 30 mg/kg solution    | 7317                     | 1.5            | 24.5                                | 1.23 [8.0]           | 1.91 [16.7]       | 1.14 [32.6]                  | 1.1                    |      |
| 2     | R 75                                                                             | RIF 75 mg/kg dry powder  | 23267                    | 3.2            | Not Fitted                          |                      |                   |                              |                        |      |
|       | R 150                                                                            | RIF 150 mg/kg dry powder | 38700                    | 5.5            | Not Fitted                          |                      |                   |                              |                        |      |
|       | Z 400                                                                            | PZA 400 mg/kg dry powder | 239500                   | 1.4            | 850.3                               | 0.47 [7.9]           | 1.27 [13.0]       | 3.70 [74]                    | 1.9                    |      |
|       | Z 600                                                                            | PZA 600 mg/kg dry powder | 249500                   | 1.4            | 2060.6                              | 0.29 [32.0]          | 2.48 [28.7]       | 1.59 [71.0]                  | 5.9                    |      |
| 3     | H 10, R 10, Z 250<br>H 10, R 30, Z 250                                           | INH 10 mg/kg dry powder  | 656                      | 1.9            | 7.1                                 | 1.41 [19.2]          | 19.0 [12.4]       | 2.81 [66.2]                  | 9.4                    |      |
|       | H 20, R 10, Z 250<br>H 20, R 30, Z 250                                           | INH 20 mg/kg dry powder  | 4962                     | 2.0            | 47.9                                | 0.42 [10.9]          | 2.74 [15.5]       | 1.22 [46.9]                  | 4.6                    |      |
|       | H 10, R 10, Z 250<br>H 20, R 10, Z 250                                           | RIF 10 mg/kg dry powder  | 2093                     | 2.7            | 18.3                                | 0.55 [10.1]          | 3.23 [13.8]       | 2.24 [64.4]                  | 4.1                    |      |
|       | H 10, R 30, Z 250<br>H 20, R 30, Z 250                                           | RIF 30 mg/kg dry powder  | 25298                    | 2.8            | 232.3                               | 0.13 [11.2]          | 0.53 [17.0]       | 0.58 [35.1]                  | 2.8                    |      |
|       | H 10, R 10, Z 250<br>H 20, R 10, Z 250<br>H 10, R 30, Z 250<br>H 20, R 30, Z 250 | PZA 250 mg/kg dry powder | 168180                   | 1.8            | 1078.9                              | 0.23 [7.7]           | 0.87 [11.0]       | 2.23 [44.5]                  | 2.6                    |      |
|       | 4                                                                                | E 25                     | ETH 25 mg/kg dry powder  | 811            | 4.1                                 | 38.0                 | 0.66 [41.8]       | 22.4 [32.8]                  | 0.54 [54.6]            | 23.6 |
|       |                                                                                  | E 75                     | ETH 75 mg/kg drv powder  | 2945           | 3.9                                 | 47.1                 | 1.59 [10.0]       | 22.0 [18.2]                  | 1.42 [48.5]            | 9.6  |

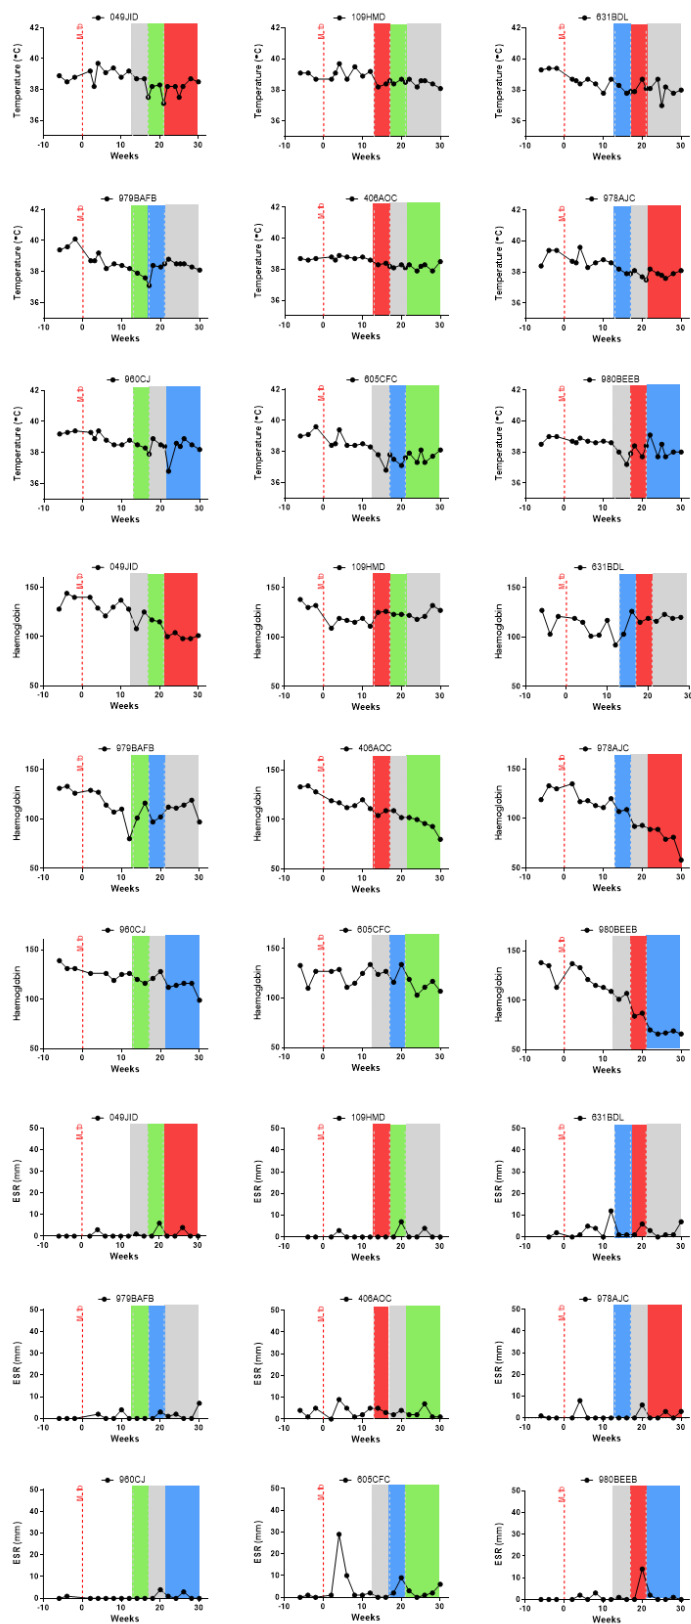

**Supplementary Figure S1. ESR and Hb for Study 1.**

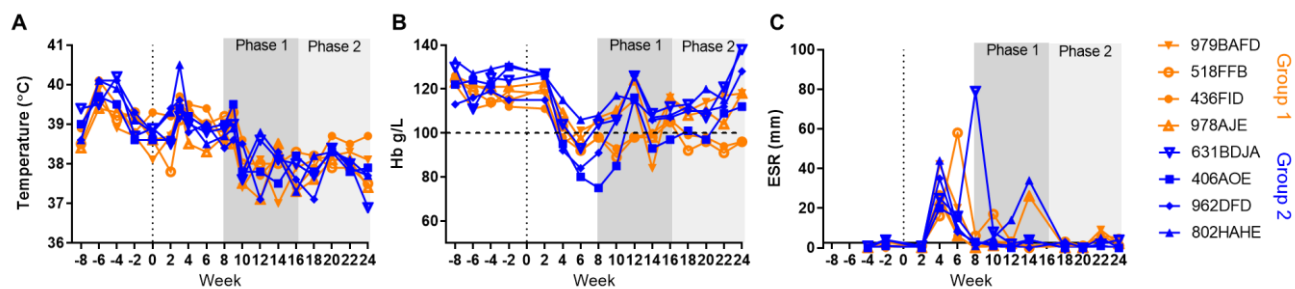

**Supplementary Figure S2. Temperature, Hb and ESR for Study 2**

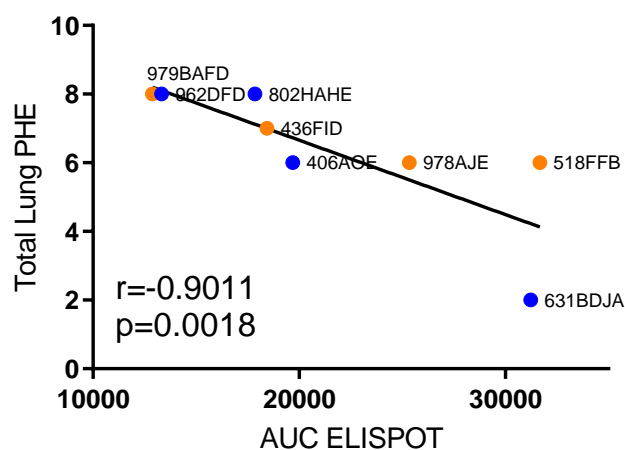

**Supplementary Figure S3 – Study 2 ELISPOT correlations with lung pathology score.**
